# Supplementary material for: Magnetic poly-o-vanillin-functionalized core–shell nanomaterials as a smart sorbent for scavenging mercury(ii) from aqueous solution
Source: Royal Society of Chemistry journal article supplement (doi:10.1039/d1nj02409d), 2021-01-01
Supplement: d1nj02409d1.pdf [file d1nj02409d1.pdf]

## Supporting Information

# Magnetic poly-o-vanillin functionalized core-shell nanomaterials as a smart sorbent for scavenging of mercury (II) from aqueous solution

Lin Qian <sup>a,†</sup>, Zheng Zeng <sup>a,†</sup>, Shuyuan Zhang <sup>a</sup>, Kai Xia <sup>a</sup> and Yongfu Guo <sup>a,b,\*</sup>

<sup>a</sup> Department of Municipal Engineering, Suzhou University of Science and Technology, Suzhou, 215009, China;

<sup>b</sup> Jiangsu Collaborative Innovation Center of Technology and Material of Water Treatment, Suzhou 215009, Jiangsu, China

\* Correspondence: yongfuguo@163.com; Tel.: +86 512 68092987

Received: date; XXX; Published: XXX

† These authors contributed equally to this work.

## 1. Characterisation

The surface feature and size of PoVan/CoFe<sub>2</sub>O<sub>4</sub>@mSiO<sub>2</sub> were characterised using transmission electron microscopy (TEM, JEOL JEM 2100, Japan) and scanning electron microscopy (SEM, Quanta FEG 250, USA). X-ray diffraction (XRD, D8 Advance, Bruker, Germany) was used to analyse the crystal structure. The functional groups were characterised using Fourier transform infrared spectroscopy (FT-IR, Nicolet 6700, Thermo Scientific, USA). The magnetic strength was measured using a vibrating sample magnetometer (VSM, LakeShore7404, USA). The specific surface area (BET) was obtained using an N<sub>2</sub> adsorption-desorption apparatus (ASAP2460, USA). Finally, the binding energy of the elements contained in the materials was obtained using X-ray photoelectron spectroscopy (XPS, Thermo Scientific K-Alpha, USA). Thermal stability was surveyed by a thermogravimetric analyzer (TGA, TG209F1 Libra, Germany), and the derivative thermogravimetry (DTG) was acquired by the differential calculation for TGA.

## 2. EDS analysis

The EDS mapping was used to analyse the elements in the material. Fig. S1 shows the images of various elements in the material of PoVan/CoFe<sub>2</sub>O<sub>4</sub>@mSiO<sub>2</sub>. From the image, six elements of Co, Fe, C, N, O and Si appear correspondingly and are evenly distributed on the surface of the material, which confirms that the polymer was successfully loaded onto the particles of the magnetic nanomaterial CoFe<sub>2</sub>O<sub>4</sub>@mSiO<sub>2</sub>.

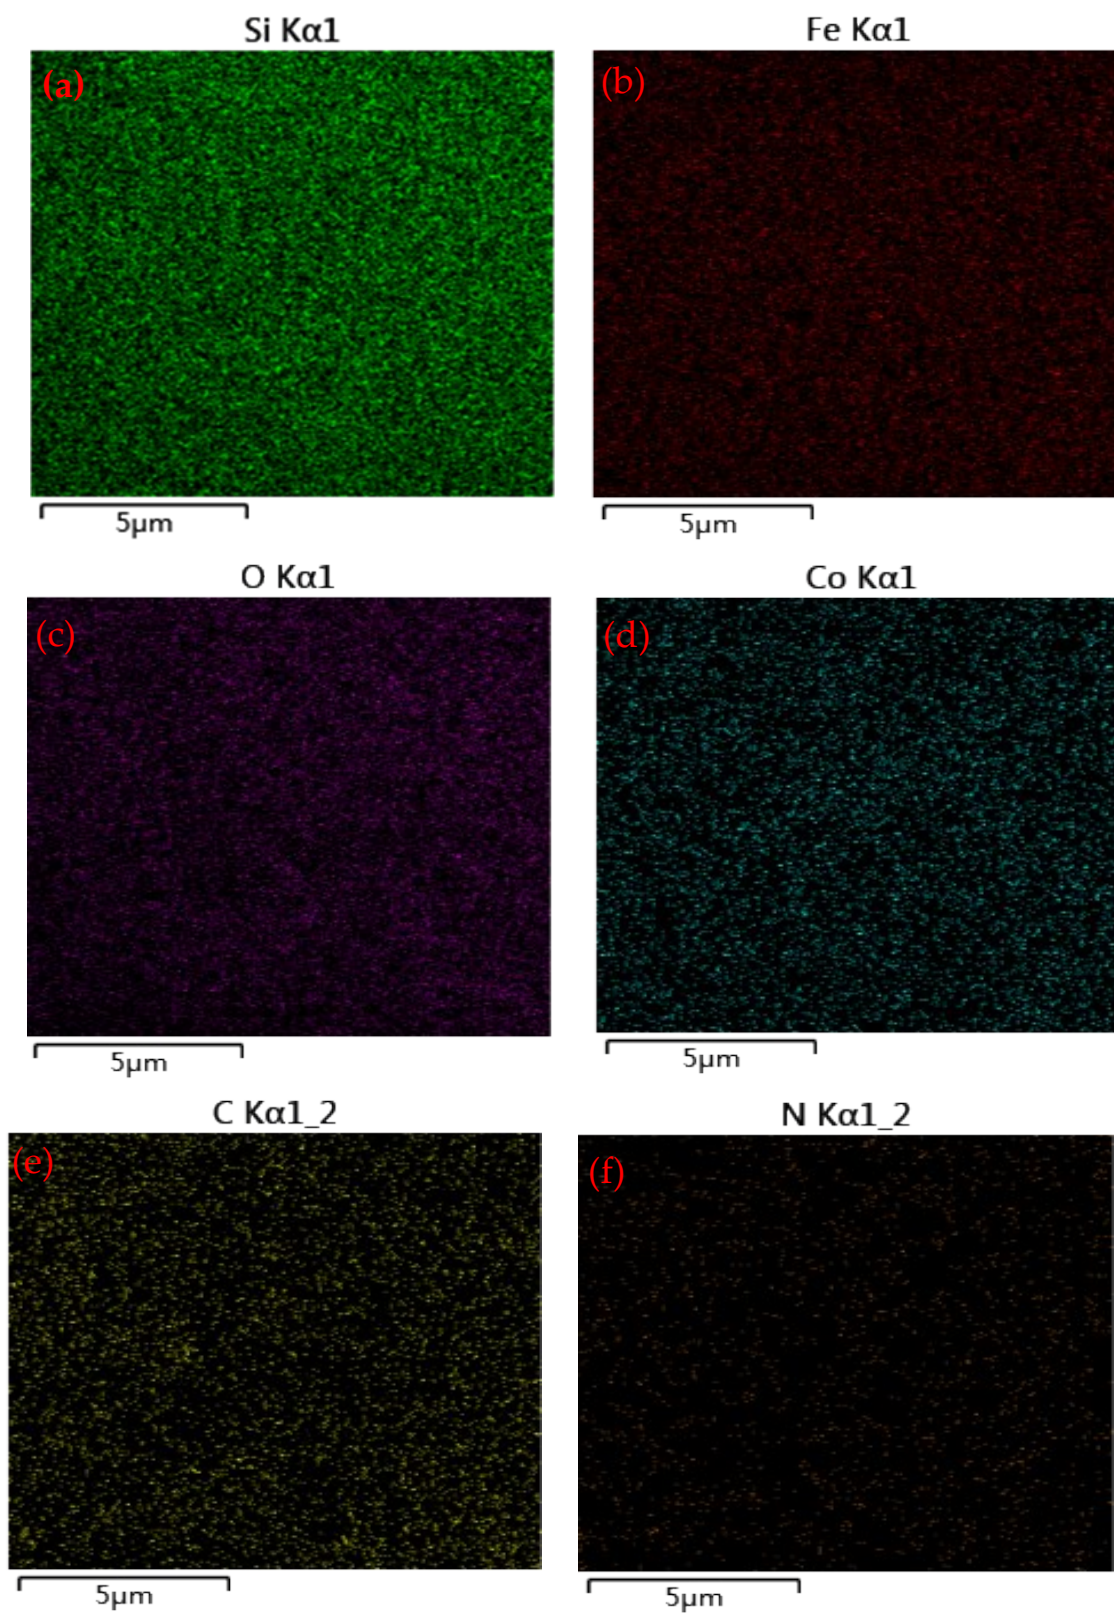

**Fig. S1.** EDS mappings of Si (a), Fe (b), O (c), Co (d), C (e) and N (f) of PoVan/CoFe<sub>2</sub>O<sub>4</sub>@mSiO<sub>2</sub>.

### 3. Models of kinetics

Three kinetic models were employed to fit the experimental results: pseudo-first-order model [Eq. (S1)], pseudo-second-order model [Eq. (S2)] and intra-particle diffusion model [Eq. (S3)].

$$\ln(q_e - q_t) = \ln q_e - k_1 t \quad (\text{S1})$$

$$\frac{t}{q_t} = \frac{1}{k_2 q_e^2} + \frac{1}{q_e} \quad (\text{S2})$$

$$q_t = k_d t^{0.5} + C \quad (\text{S3})$$

here,  $q_t$  is instantaneous adsorption capability (mg/g);  $k_1$  ( $\text{min}^{-1}$ ),  $k_2$  (g/mg/min) and  $k_{d-i}$  ( $\text{min}^{-1}$ ) are all adsorption rate constants;  $C_i$  is the boundary layer thickness (mg/g).

### 4. Isotherm models

$$\frac{C_e}{q_e} = \frac{C_e}{Q_F} + \frac{1}{Q_F K_L} \quad (\text{S4})$$

$$q_e = k_F C_e^{\frac{1}{n_F}} \quad (\text{S5})$$

$$q_e = \frac{RT}{b_i} \ln(K_T C_e) \quad (\text{S6})$$

$$q_e = q_{\max} e^{(-\beta \varepsilon^2)} \quad (\text{S7})$$

$$R_L = (1 + K_L C_0)^{-1} \quad (\text{S8})$$

here,  $Q_F$  (mg/g) is the maximum adsorption capability.  $K_L$  (L/mg),  $K_F$ ,  $q_{\max}$  (mg/g) and  $K_T$  (L/mg) are Langmuir [Eq. (S4)], Freundlich [Eq. (S5)], Temkin [Eq. (S6)] and Dubinin-Radushkevich [Eq. (S7)] constants.  $R$  is gas constant (8.314 J/mol/K).  $\beta$  is a coefficient related with adsorption energy.  $R_L$  is the separation constant of the Langmuir isotherm model.
